# Supplementary material
Source: PubMed Central journal article supplement (PMC8788677)
Supplement: iai.00314-21-s0001.pdf [file iai.00314-21-s0001.pdf]

**Supplementary Figure 1: Multiple sequence alignment (MSA) of (A) *Plasmodium* von Willebrand factor A domain-related protein (WARP) and (B) *Plasmodium* secreted ookinete adhesive protein (SOAP) protein of *Plasmodium* species infecting gorillas, chimpanzees, humans, birds, monkeys and rodents. The asterisk (\*) depicts fully conserved amino acid residues; amino acids showing strongly similar properties are represented by a colon (:); and weakly conserved amino acids by a period (.). The *Plasmodium* species with a short form chitinase have one conserved cysteine residue in the N-terminal structure of the WARP and SOAP proteins compared to all long form chitinases which do not, as indicated with red box.**

**A. *Plasmodium* von Willebrand factor A domain-related protein (WARP)**

|                                    |                                                                    |     |
|------------------------------------|--------------------------------------------------------------------|-----|
| P.yoelii_17X_Curated               | MKSVKGYIYFFSLASISICMCQNINVVSHN-VIPRV----DSDENLITCVTEYIIKIGDL       | 55  |
| P.yoelii_YM_Non-Reference          | MKSVKGYIYFFSLASISICMCQNINVVSHN-VIPRV----DSDENLITCVTEYIIKIGDL       | 55  |
| P.berghei                          | MKSVKGYIYFFSLAFISICMCQKVNVSHPN-VTPRV----DSDEKLITCVTEYIIKIGDL       | 55  |
| P.vinckei_vinckei_Reference        | MRSIKGISYIYFFSLVFIGSCMSEKVNVSHPN-IIPRI----NPDEKLITCVTEYIIKIGDL     | 55  |
| P.vinckei_petteri_CR_Non-Reference | MKSIRGITYIYFFSLAFIGSCMCKQKVNVSHPN-IIPRV----NPDEKLITCVTEYIIKIGDL    | 55  |
| P.chabaudi_Curated                 | MKSIRGITYIYFFSLAFIGSCMCKEINVSHPN-IIPRI----NPDEKLITCVTEYIIKIGDL     | 55  |
| P.blacklocki_G01_Reference         | MKSLRVVFLCLGMISACMLVGYTCYKMNVSHPN-SMKKV-GEEGKDEKIIICVVEYVIKIGDL    | 58  |
| P.gaboni_SY75_Reference            | MKSLRAIFCLGMISACMFVGSYGRMNVSHPN-SMKKV-GEEGNDEKIIICVVEYVIKIGDL      | 58  |
| P.adleri_G01_Reference             | MKSLRAIFCLGMISACMFVGSYGRMNVSHPN-SMKKV-GEEGNDEKIIICVVEYVIKIGDL      | 58  |
| P.gaboni_G01_Non-Reference         | MKSLRAIFCLGMISACMFVGSYGRMNVSHPN-SMKKV-GEEGNDEKIIICVVEYVIKIGDL      | 58  |
| P.reichenowi_CDC_Curated           | MKSLKVVLCCLGMISACMLVGYTCYKMNVSHPN-SMKRV-GEEGKDEKIIICVVEYVIKIGDL    | 58  |
| P.reichenowi_G01_Non-Reference     | MKSLKVVLCCLGMISACMLVGYTCYKMNVSHPN-SMKRV-GEEGKDEKIIICVVEYVIKIGDL    | 58  |
| P.billcollinsi_G01_Reference       | MKSLKVVLCCLGMISACMLVGYTCYKMNVSHPN-SMKKV-GEEGKDEKIIICVVEYVIKIGDL    | 58  |
| P.falci-parum_3D7_Curated          | MKSLKVVLCCLGMISACMLVGYTCYKMNVSHPN-SMKKV-GEEGKDEKIIICVVEYVIKIGDL    | 58  |
| P.praefalci-parum_G01_Reference    | MKSLKVVLCCLGMISACMLVGYTCYKMNVSHPN-SMKKV-GEEGKDEKIIICVVEYVIKIGDL    | 58  |
| P.gallinaceum_8A_Curated           | -----MISYLLMLLSFFAISTYEKLNVISHS-SVSR-LNDEKRNKVIITCVTEYIIKIGDL      | 53  |
| P.relictum_SGS1-like_Curated       | MKSTRIVSFFMLLLAFFTISTYEKMNVSHPN-SASRA-GEGGKNGKVIITCVTEYIIKIGDL     | 58  |
| P.knowlesi_H_Curated               | MKGARVVSCLILLLAYVQSSVSAMNVSANNSAVPRIDGEDGSDEKVIITCVTKYVIKIGDL      | 60  |
| P.knowlesi_Malayan                 | MKGARVVSCLILLLAYVQSSVSAMNVSANNSAVPRIDGEDGSDEKVIITCVTKYVIKIGDL      | 60  |
| P.cynomolgi_B_Non-reference        | -----MNLVSHN-SVPRFGGEEGSDKVIITCVTKYVIKIGDL                         | 35  |
| P.cynomolgi_M_Reference            | MKGAYVLSCLVLLLAHVHSSASAKMNLVSHN-SVPRFGGEEGSDKVIITCVTKYVIKIGDL      | 59  |
| P.vivax-like                       | MKGSHAVFCLTLLALVHNSVSAKINLVSHN-SLPRIGGEEGSDKVIITCVTKYVIKIGDL       | 59  |
| P.vivax_P01_Curated                | MKGSHAVFCLTLLALVHNSVSAKINLVSHN-SVPRIGGEEGSDKVIITCVTKYVIKIGDL       | 59  |
| P.vivax_Sal-1_Non-Reference        | MKGSHAVFCLTLLALVHNSVSAKINLVSHN-SVPRIGGEEGSDKVIITCVTKYVIKIGDL       | 59  |
| P.malariae_UG01_Curated            | ---MKKILCFAPFLLEYATITLYAKINNVSN-SVPRIA-KEGENEKIITCVTEYVIKIGDL      | 55  |
| P.ovale                            | MKNVKEVLCFLFLAYVNICTYAKMNTVSHS-SVPKIA-EQSNDEKIIITCVTEYVIKIGDL      | 58  |
|                                    | * * * * * : : : : : . . . . . * * * * * : : : : *                  |     |
| P.yoelii_17X_Curated               | GIDDDGGFCDSINIL--PPPPEPCNSIPE-----KPEGPLNGYCDNYDITLIVNESS          | 107 |
| P.yoelii_YM_Non-Reference          | GIDDDGGFCDSINIL--PPPPEPCNSIPE-----KPEGPLNGYCDNYDITLIVNESS          | 107 |
| P.berghei                          | GIDDDGGFCDSINISL--PPTESCNGGSE-----KPEGPTNGYCDNYDITLIVNESS          | 107 |
| P.vinckei_vinckei_Reference        | DIDDDGGFCDSINIL--PPTGSCNNGGSE-----KPDGANPGNYCDNYDITLIVNESS         | 107 |
| P.vinckei_petteri_CR_Non-Reference | DIDDDGGFCDSINIL--PPTGSCNNGGSE-----KPDGANPGNYCDNYDITLIVNESS         | 107 |
| P.chabaudi_Curated                 | DIDDDGGFCDSINIL--PPNGSCNNGGSE-----KPDGPNPGNYCDNYDITLIVNESS         | 107 |
| P.blacklocki_G01_Reference         | GIDDDGDFCDNSIICS--NNPGLCDNG-----QVVVPGDYCSNYDITLIVNESS             | 105 |
| P.gaboni_SY75_Reference            | SIDDDGDFCDNSIICS--NNPGLCDNG-----QVVVPGDYCSNYDITLIVNESS             | 105 |
| P.adleri_G01_Reference             | SIDDDGDFCDNSIICS--NNPGLCDNG-----QVVVPGDYCSNYDITLIVNESS             | 105 |
| P.gaboni_G01_Non-Reference         | SIDDDGDFCDNSIICS--NNPGLCDNG-----QVVVPGDYCSNYDITLIVNESS             | 105 |
| P.reichenowi_CDC_Curated           | SIDDDGDFCDNSIICS--NNPGLCDNG-----QVVVPGDYCSNYDITLIVNESS             | 105 |
| P.reichenowi_G01_Non-Reference     | SIDDDGDFCDNSIICS--NNPGLCDNG-----QVVVPGDYCSNYDITLIVNESS             | 105 |
| P.billcollinsi_G01_Reference       | SIDDDGDFCDNSIICS--NNPGLCDNG-----QVVVPGDYCSNYDITLIVNESS             | 105 |
| P.falci-parum_3D7_Curated          | SIDDDGDFCDNSIICS--NNPGLCDNG-----QVVVPGDYCSNYDITLIVNESS             | 105 |
| P.praefalci-parum_G01_Reference    | SIDDDGDFCDNSIICS--NNPGLCDNG-----QVVVPGDYCSNYDITLIVNESS             | 105 |
| P.gallinaceum_8A_Curated           | EIDDDNLFCENETSCSPSSS-----EASGSDYCDNYDITLIVNESS                     | 95  |
| P.relictum_SGS1-like_Curated       | DIDDDGGFCDSQASCSSN-P-----ESDVSNGYCDNYDITLIVNESS                    | 99  |
| P.knowlesi_H_Curated               | EIDDDGGFCSSNIGS--ESPPGSC-----NDTGANPGNYCDNYDITLIVNESS              | 106 |
| P.knowlesi_Malayan                 | EIDDDGGFCSSNIGS--ESPPGSC-----NDTGANPGNYCDNYDITLIVNESS              | 106 |
| P.cynomolgi_B_Non-reference        | EIDDDGGFCSSSISGS--QSPGSC-----ADGGANTGNYCDNYDITLIVNESS              | 81  |
| P.cynomolgi_M_Reference            | EIDDDGGFCSSSISGS--QSPGSC-----ADGGANTGNYCDNYDITLIVNESS              | 105 |
| P.vivax-like                       | EIDDDGGFCSSNIGS--QSPGSC-----ADGGASPGNYCDNYDITLIVNESS               | 107 |
| P.vivax_P01_Curated                | EIDDDGGFCSSNIGS--QSPGSC-----ADGGASPGNYCDNYDITLIVNESS               | 107 |
| P.vivax_Sal-1_Non-Reference        | EIDDDGGFCSSNIGS--QSPGSC-----ADGGASPGNYCDNYDITLIVNESS               | 107 |
| P.malariae_UG01_Curated            | HIDDDGGFCSTSTESS--SNGD-----ESSVDVGVDPNGAYCDNYDITLIVNESS            | 103 |
| P.ovale                            | SIDDDGGFCSTTVSS--SKPGSCAEGDSESTAESESTGGTSGNYCDNYDITLIVNESS         | 116 |
|                                    | ***. * * . . . . . * * * . . . . . * * * . . . . . * * * . . . . . |     |

P.yoelii\_17X\_Curated FIQKDYWMKGTIPFLESMVRNARVSKDKAHMAIILFAGRQDLIVPPTDELSQDKEKLIDK 167  
P.yoelii\_YM\_Non-Reference FIQKDYWMKGTIPFLESMVRNARVSKDKAHMAIILFAGRQDLIVPPTDELSQDKEKLIDK 167  
P.berghei FVQKDYWMKGTIPFLESMARNARVSKDKAHMSIILFAGTQNLIVPPTDEISQDKEKLIEK 167  
P.vinckei\_vinckei\_Reference FVQKDYWMKGTIPFLESMARNARVSKDKAHMSIILFAERQDLIVPPTDELSQDKEKLIDK 167  
P.vinckei\_petteri\_CR\_Non-Reference FVQKDYWMKGTIPFLESMARNARVSKDKAHMSIILFAERQNLIVPPTDEMSQDKEKLIDK 167  
P.chabaudi\_Curated FVQKDYWMKGTIPFLESMARNARVSKDKAHMSIILFAERQNLIVPPTDEMSQDKEKLIDK 167  
P.blacklocki\_G01\_Reference FVQKDYWLKGTIPFLESMVINSNVSKDKAHMSVILFAGKQRFVFPPTDESSQDKNMILLEK 165  
P.gaboni\_SY75\_Reference FVQKDYWLKGTIPFLESMVINSNVSKDKAHMSIILFAGKQRFVFPPTDESSQDKNMILLEK 165  
P.adleri\_G01\_Reference FVQKDYWLKGTIPFLESMVINSNVSKDKAHMSVILFAGKQRFVFPPTDESSQDKNMILLEK 165  
P.gaboni\_G01\_Non-Reference FVQKDYWLKGTIPFLESMVINSNVSKDKAHMSVILFAGKQRFVFPPTDESSQDKNMILLEK 165  
P.reichenowi\_CDC\_Curated FVQKDYWLKGTIPFLESMVINSNVSKDKAHMSVILFAGKQRFVFPPTDESSQDKNMILLEK 165  
P.reichenowi\_G01\_Non-Reference FVQKDYWLKGTIPFLESMVINSNVSKDKAHMSVILFAGKQRFVFPPTDESSQDKNMILLEK 165  
P.billcollinsi\_G01\_Reference FVQKDYWLKGTIPFLESMVINSNVSKDKAHMSVILFAGKQRFVFPPTDESSQDKNMILLEK 165  
P.falciiparum\_3D7\_Curated FVQKDYWLKGTIPFLESMVINSNVSKDKAHMSVILFAGKQRFVFPPTDESSQDKNMILLEK 165  
P.praefalciiparum\_G01\_Reference FVQKDYWLKGTIPFLESMVINSNVSKDKAHMSVILFAGKQRFVFPPTDESSQDKNMILLEK 165  
P.gallinaceum\_8A\_Curated FVQKDYWLKGTIPFLESMIRNVRVSKDKAHMSIILFDRDQRLIVPPTDEISQDKQLIEK 155  
P.relictum\_SGS1-like\_Curated FVQKDYWLKGTIPFLESMIRNVRVSKDKAHMSIILFDRDQRFVFPPTDEISQDKQLIEK 159  
P.knowlesi\_H\_Curated FIQKDYWKKGTTIPFLESMVRNARVSKDKAHMSIIVLFARDSRVIVPPTDELSQDKDLIEK 166  
P.knowlesi\_Malayan FIQKDYWKKGTTIPFLESMVRNARVSKDKAHMSIIVLFARDSRVIVPPTDELSQDKDLIEK 166  
P.cynomolgi\_B\_Non-reference FVQKDYWKKGTTIPFLESMVRNARVSKDKAHMSVILFARDPRVIVPPTDEVSQDKDLIER 141  
P.cynomolgi\_M\_Reference FVQKDYWKKGTTIPFLESMVRNARVSKDKAHMSVILFARDPRVIVPPTDEVSQDKDLIER 165  
P.vivax-like FVQKDYWQKGTIPFLESMVRNARVSKDKAHMSVILFARDPRVIVPPTDEASQDKDLIER 167  
P.vivax\_P01\_Curated FVQKDYWQKGTIPFLESMVRNARVSKDKAHMSVILFARDPRVIVPPTDEASQDKDLIER 167  
P.vivax\_Sal-1\_Non-Reference FVQKDYWQKGTIPFLESMVRNARVSKDKAHMSVILFARDPRVIVPPTDEASQDKDLIER 167  
P.malariae\_UG01\_Curated FVQKDYWLKGTIPFLESMIRNTRISKDKAHMSLILFAYDQRFVFPPTDEISQDKDFIEK 163  
P.ovale FIQKDYWLKGTIPFLESMVRNARVSKDKAHMSIILFAYDQRFVFPPTDEISQDKDLIEK 176  
\*:\*:\*:\*:\*:\*:\*:\*:\* \* ..\*\*\*\*\*:\*\*\* ..\*\*\*\*\*:\*\*\*:\*\*\*:\*\*\*:

P.yoelii\_17X\_Curated IRTLND-AATDSNTLYVYALEYAFEKVIIFGEGTRSDAPKVAFLFYGFYDGSNTSLIPDV 226  
P.yoelii\_YM\_Non-Reference IRTLND-AATDSNTLYVYALEYAFEKVIIFGEGTRSDAPKVAFLFYGFYDGSNTSLIPDV 226  
P.berghei IRTLDD-AGTDSNTLYVYALEYAFEKVIIFGEGTRSDAPKVAFLFYGFYDYGANKSLIPDV 226  
P.vinckei\_vinckei\_Reference IRLSLDD-AATNPHTLYVYALEYALEKVIIFGEGTRSDAPKVAFLFYGFYDYGANKSLIPDV 226  
P.vinckei\_petteri\_CR\_Non-Reference IRLSLDD-AATNPHTLYVYALEYALEKVIIFGEGTRSDAPKVAFLFYGFYDYGANKSLIPDV 226  
P.chabaudi\_Curated IRLSLDD-AATNQHTLYVYALEYALEKVIIFGEGTRSDAPKVAFLFYGFYDYGANKSLIPDV 226  
P.blacklocki\_G01\_Reference INSIDEGIAASSDTLYVNALKYAIENVIIFGDGTRKDAPKVAFLFYGFYDYGANKNMIPDV 225  
P.gaboni\_SY75\_Reference INSIDEGIATSSDTLYVNALKYAIENVIIFGDGTRKDAPKVAFLFYGFYDYGANKNMIPDV 225  
P.adleri\_G01\_Reference INSIDEGIATSSDTLYVNALKYAIENVIIFGDGTRKDAPKVAFLFYGFYDYGANKNMIPDV 225  
P.gaboni\_G01\_Non-Reference INSIDEGIATSSDTLYVNALKYAIENVIIFGDGTRKDAPKVAFLFYGFYDYGANKNMIPDV 225  
P.reichenowi\_CDC\_Curated INSIDEGIATSSDTLYVNALKYAIENVIIFGDGTRKDAPKVAFLFYGFYDYGANKSMIPDV 225  
P.reichenowi\_G01\_Non-Reference INSIDEGIATSSDTLYVNALKYAIENVIIFGDGTRKDAPKVAFLFYGFYDYGANKSMIPDV 225  
P.billcollinsi\_G01\_Reference INSIDEGIATSSDTLYVNALKYAIENVIIFGDGTRKDAPKVAFLFYGFYDYGANKNMIPDV 225  
P.falciiparum\_3D7\_Curated INSIDEGIATSSDTLYVNALKYAIENVIIFGDGTRKDAPKVAFLFYGFYDYGANKNMIPDV 225  
P.praefalciiparum\_G01\_Reference INSIDEGIATSSDTLYVNALKYAIENVIIFGDGTRKDAPKVAFLFYGFYDYGANKNMIPDV 225  
P.gallinaceum\_8A\_Curated VKGIND-VARGPDTLYVYALEYALENVIIFGDGTRSDAPKVAFLFYGYDYGANKSLIPDI 214  
P.relictum\_SGS1-like\_Curated VKTIND-VGRSPDALYVYALEYALENVIIFGDGTRSDAPKVAFLFYGYDYGANKHLIPDV 218  
P.knowlesi\_H\_Curated VRAINDD-VATSPDTLYVYALEHAFEHVIFGEGTRKDAPKVVVLFYGFYDYGANKSLIPDV 225  
P.knowlesi\_Malayan VRAINDD-VATSPDTLYVYALEHAFEHVIFGEGTRKDAPKVVVLFYGFYDYGANKSLIPDV 225  
P.cynomolgi\_B\_Non-reference VRAIDD-VGTSPDTLYVYALEHAFEHVIFGEGTRKDAPKVAFLFYGFYDYGANKSLIPDV 200  
P.cynomolgi\_M\_Reference VRAIDD-VGTSPDTLYVYALEHAFEHVIFGEGTRKDAPKVAFLFYGFYDYGANKSLIPDV 224  
P.vivax-like VRAIDD-VGTSPDTLYVYALEHTLEHVIFGEGTRKDAPKVVVLFYGFYDYGANKSLIPDV 226  
P.vivax\_P01\_Curated VRAIDD-VGTSPDTLYVYALEHTLEHVIFGEGTRKDAPKVVVLFYGFYDYGANKSLIPDV 226  
P.vivax\_Sal-1\_Non-Reference VRAIDD-VGTRPDTLYVYALEHTLEHVIFGEGTRKDAPKVVVLFYGFYDYGANKSLIPDV 226  
P.malariae\_UG01\_Curated IRTIDD-VGKSADTLYVYALEYAMEKVIIFGNGTRDNAPKVAFLFYGFYDYGANKSLIPDV 222  
P.ovale IRTIDD-TSKSPHILYVHALQYAIKVIIFGKTRGDAPKVVVLFYGYDNGTNSKSLIPDV 235  
:. :. :. . \*\* .\*\*\*:\*\*\*:\*\*\*:\*\*\*:\*\*\*:\*\*\*:\*\*\*:\*\*\*:\*\*\*:\*\*\*:\*\*\*:\*\*\*:\*\*\*:\*\*\*:\*\*\*:

|                                    |                                                              |     |
|------------------------------------|--------------------------------------------------------------|-----|
| P.yoelii_17X_Curated               | VEDYKQNNIKLIIVGIALGNKQNAFILADCK-SDGDCPNLILEPWDYVIRAAEQVKGKIC | 285 |
| P.yoelii_YM_Non-Reference          | VEDYKQNNIKLIIVGIALGNKQNAFILADCK-SDGDCPNLILEPWDYVIRAAEQVKGKIC | 285 |
| P.berghei                          | VEDYKQSNIKLIIVGIGLTLRENALLADCK-SEGDCQNAIFQPWDFVIPAEEQVKEKIC  | 285 |
| P.vinckei_vinckei_Reference        | VEDYKQNNIKLIIVGIGLANRENAFLLGDCK-GESDCQNVIFKPWDFVIPAEEQVKEKIC | 285 |
| P.vinckei_petteri_CR_Non-Reference | VEDYKQNNIKLIIVGIGLANRENAFLLGDCK-SESDCQNVIFKPWDFVIPAEEQVKEKIC | 285 |
| P.chabaudi_Curated                 | VEDYKQNNIKLIIVGIGLANRENAFLLGDCK-GESDCQNVIFKPWDFVIPAEEQVKEKIC | 285 |
| P.blacklocki_G01_Reference         | VQAYKEQNVKLIIVGIALGIRDNAYLLAGCSIGDENCNVVFKPWDFVIPAADVNQKIC   | 285 |
| P.gaboni_SY75_Reference            | VQSYKEQNVKLIIVGIALGIRDNAYLLADCSIGDENCNVVFKPWDFVIPAADVDQKIC   | 285 |
| P.adleri_G01_Reference             | VQSYKEQNVKLIIVGIALGIRDNAYLLADCSIGDENCNVVFKPWDFVIPAADVDQKIC   | 285 |
| P.gaboni_G01_Non-Reference         | VQSYKEQNVKLIIVGIALGIRDNAYLLADCSIGDENCNVVFKPWDFVIPAADVDQKIC   | 285 |
| P.reichenowi_CDC_Curated           | VQAYKEQNVKLIIVGIALGIRDNAYLLADCSIGDENCNVVFKPWDFVIPAADVNEKIC   | 285 |
| P.reichenowi_G01_Non-Reference     | VQAYKEQNVKLIIVGIALGIRDNAYLLADCSIGDENCNVVFKPWDFVIPAADVNEKIC   | 285 |
| P.billcollinsi_G01_Reference       | VQTYKEQNVKLIIVGIALGIRDNAYLLADCSIGDENCNVVFKPWDFVIPAADVNQKIC   | 285 |
| P.falciparum_3D7_Curated           | VQTYKEQNVKLIIVGIALGIRDNAYLLADCSIGDENCNVVFKPWDFVIPAADVNQKIC   | 285 |
| P.praefalciparum_G01_Reference     | VQAYKEQNVKLIIVGIALGIRDNAYLLADCTIGDENCNVVFKPWDFVIPAADVNQKIC   | 285 |
| P.gallinaceum_8A_Curated           | VEDYKNNIKLIIVGIGLGNKDNAYLLADCSIDDNNCANVIFKPWDFVIPAEEQVKEKIC  | 274 |
| P.relictum_SGS1-like_Curated       | VEDYKKNIKLIIVGIALSNRDNAYLLADCSINDNCTNVVFPWDFVIPAEEQVKEIIC    | 278 |
| P.knowlesi_H_Curated               | VEDYKKNIKLIIVGIALGNRDNAYLLGGCAIGDNNCANVIFKPWDFVIPAEEVKNKIC   | 285 |
| P.knowlesi_Malayan                 | VEDYKKNIKLIIVGIALGNRDNAYLLGGCAIGDNNCANVIFKPWDFVIPAEEVKNKIC   | 285 |
| P.cynomolgi_B_Non-reference        | VEDYRDRNVKLIIVGIALGNRDNAYLLGGCAIGDNCANVIFKPWDFVIPAADVKEKIC   | 260 |
| P.cynomolgi_M_Reference            | VEDYRDRNVKLIIVGIALGNRDNAYLLGGCAIGDNCANVIFKPWDFVIPAADVKEKIC   | 284 |
| P.vivax-like                       | VEDYRERNVKLIIVGIALGNRDNAYLLGGCAIGDQNCANVIFKPWDFVIPAEEVKEKIC  | 286 |
| P.vivax_P01_Curated                | VEDYRERNVKLIIVGIALGNRDNAYLLGGCAIGDQNCANVIFKPWDFVIPAEEVKEKIC  | 286 |
| P.vivax_Sal-1_Non-Reference        | VEDYRERNVKLIIVGIALGNRDNAYLLGGCAIGDQNCANVIFKPWDFVIPAEEVKEKIC  | 286 |
| P.malariae_UG01_Curated            | VKDYRDKNIKLIIVGIALGNTDNAYLLANCSIGEANCANVIFKPWDFVIPAEEQVKAIC  | 282 |
| P.ovale                            | VEEYRKNNIKLIIVGIALGNRDNAYLLANCSIGDENCANVIFKPWDFVIAAAEKVNEKIC | 295 |

\*: \*. \* \*\* : \* \* \* \* \* \* \* : \* \* : \* . \* . : : \* \* : : \* \* \* \* \* \* . \* . \* \*

|                                    |                     |     |
|------------------------------------|---------------------|-----|
| P.yoelii_17X_Curated               | NKNNLSSLTPESKTMIKN- | 303 |
| P.yoelii_YM_Non-Reference          | NKNNLSSLTPESKTMIKN- | 303 |
| P.berghei                          | NKNNPSSLTSEKTTIKN-  | 303 |
| P.vinckei_vinckei_Reference        | NKNDPSQTA-----      | 294 |
| P.vinckei_petteri_CR_Non-Reference | NKNDPSSQAA-----     | 295 |
| P.chabaudi_Curated                 | NKNDPSSQTA-----     | 295 |
| P.blacklocki_G01_Reference         | DKNES-----          | 290 |
| P.gaboni_SY75_Reference            | DKNES-----          | 290 |
| P.adleri_G01_Reference             | DKNES-----          | 290 |
| P.gaboni_G01_Non-Reference         | DKNES-----          | 290 |
| P.reichenowi_CDC_Curated           | DKNKS-----          | 290 |
| P.reichenowi_G01_Non-Reference     | DKNNS-----          | 290 |
| P.billcollinsi_G01_Reference       | DKNES-----          | 290 |
| P.falciparum_3D7_Curated           | DKNKS-----          | 290 |
| P.praefalciparum_G01_Reference     | DKNKS-----          | 290 |
| P.gallinaceum_8A_Curated           | NKNKSKGK-SSMIQKVYK  | 292 |
| P.relictum_SGS1-like_Curated       | NKDKSENQSPSMIQKIVYK | 297 |
| P.knowlesi_H_Curated               | NKDDPASTN-----      | 294 |
| P.knowlesi_Malayan                 | NKDDPASTN-----      | 294 |
| P.cynomolgi_B_Non-reference        | SKGNSEEGSASTD-----  | 273 |
| P.cynomolgi_M_Reference            | SKGNSEEGSASTD-----  | 297 |
| P.vivax-like                       | SKGESDSTD-----      | 295 |
| P.vivax_P01_Curated                | SKGSDSTD-----       | 295 |
| P.vivax_Sal-1_Non-Reference        | SKGSDSTD-----       | 295 |
| P.malariae_UG01_Curated            | SKDNSA-----         | 288 |
| P.ovale                            | DKYNIEE-----        | 302 |

\* . \* .

**B) Plasmodium secreted ookinete adhesive protein (SOAP)**

|                                     |                                                                |     |
|-------------------------------------|----------------------------------------------------------------|-----|
| P.knowlesi_Malayan_Non-Reference    | MKRV-LILLLSLLLWAYAHGESSNII-----P---HMVERKKDTSATKIFSPRTTDDK     | 49  |
| P.knowlesi_H_Curated                | MKRV-LILLLSLLLWAYAHGESSNII-----P---HMVERKKDTSATKIFSPRTTDDK     | 49  |
| P.fragile_Nilgiri_Reference         | MKRV-LIFLLPLFLTAYVHGRSSSIT-----S---HIHQQTKNASAAEIFSPKTTDDK     | 49  |
| P.coatneyi_Hackeri_Reference        | -----                                                          | 0   |
| P.cynomolgi_B_Non-Reference         | MKRV-LIFLLPL-LALTYAHGRSSDIT-----S---HIHQRTKNASATEIFSPKTTDQ     | 48  |
| P.cynomolgi_M_Reference             | MKRV-LIFLLPL-LALTYAHGRSSDIT-----S---HIHQRTKNASATEIFSPKTTDQ     | 48  |
| P.vivax_P01_Curated                 | MKRV-LILLLPLLLALAYAQGRSSDIT-----S---HVHQRTKNASAAEIFSPKTTDDK    | 49  |
| P.vivax_Sal-1_Non-Reference         | MKRV-LILLLPLLLALAYAQGRSSDIT-----S---HVHQRTKNASAAEIFSPKTTDDK    | 49  |
| P.vivax-like                        | MKRV-LILLLPLFLALAYAQGRSSDIT-----S---HFHQRTKNASAAEIFSPKTTDDK    | 49  |
| P.praefalciparum_G01_Reference      | MKNFTCFPLLTL-LTIAYGKGVNRKSENRTPYVHY---HNNSNIKNYSAVDIFSPKKTGK   | 56  |
| P.reichenowi_G01_Non-Reference      | MKNFTCFPLLTLTLTAYGKGVNRKSENRTPYVHY---HNNSNIKNYSAIDIFSPKKTGK    | 57  |
| P.reichenowi_CDC_Curated            | MKNFTCFPLLTLTLTAYGKGVNRKSENRTPYIHY---HNNSNIKNYSAIDIFSPKKTGK    | 57  |
| P.falciparum_3D7_Reference          | MKNFTCFPLLTLTLTAYGKGVNRKSENRTPYVHY---HNNSNIKNYSAVDIFSPKKTGK    | 57  |
| P.adleri_G01_Reference              | MKKSTCFPLLTLTLTAYGKGVNRKSENRTSYVHY---HNNSNIKNYSAIDIFSPKKTGK    | 57  |
| P.gaboni_SY75_Reference             | MKKYTCFPLLTLTLTAYGKGVNRKSENRTSYVHY---HNNSNIRNYSAVDIFSPKKTGK    | 57  |
| P.gaboni_G01_Non-Reference          | MKKYTCFPLLTLTLTAYGKGVNRKSENRTSYVHY---HNNSNIRNYSAVDIFSPKKTGK    | 57  |
| P.billcollinsi                      | MKKFTCFPLLTLTLTAYGKGVNRKSESRTPYVHY---HNNSNIKNYSAVDIFSPKKTGK    | 57  |
| P.blacklocki_G01                    | MKKFTCFPLLTLTLTAYGKGVNRKSENRTPYVHY---HNNSNIKNYSAVDIFSPKKTGK    | 57  |
| P.gallinaceum_8A                    | MKKI-FIIFVSLFCAFIYGKGVNRNISR-KSSVAHP---HNQHKVKNVSALEIFSPREKTEK | 55  |
| P.relictum_SGS1-like_Curated        | MKKI-LIIFVPLFCAPAFYKGVNRVST-KSSIARP---HDQSNVKNFSAEIVFSPKKTGK   | 55  |
| P.ovale_curtisi_GH01_Curated        | MKKV-LFMFIPLLCALIQGKGIKNLSM-RSAVASP---HNHKKVTFNSATDIFEPRTTQK   | 55  |
| P.malariae_UG01_Curated             | MKKI-LIVFIPLLFALICAHEERKFSL-KRSVTNAHNNNNNSVRNYSAVDIFSPKTTQK    | 58  |
| P.yoelii_17X_Curated                | MKRI-LLFLIPLFLIIKIEGARKNSI-RNVVSAY---PHNNVKNFSAEIVFSPKTTGQ     | 55  |
| P.yoelii_YM_Non-Reference           | MKRI-LLFLIPLFLIIKIEGARKNSI-RNVVSAY---PHNNVKNFSAEIVFSPKTTGQ     | 55  |
| P.berghei_ANKA_Curated              | MKRI-LLFLIPLFLIIKIEGARKNSI-RNVVSAY---PHNNVKNFSAEIVFSPKTTGQ     | 55  |
| P.chabaudi_Curated                  | MKRI-LLFLIPLFLIIKIEGTRKHSI-RNIVSTY---PHNNVKNFSAEIVFEPQTGQ      | 55  |
| P.vinckeii_petteri_CR_Non-Reference | MKRI-LLFLIPLFLIIKIEGTRKHSI-RNIVSAY---PHNNVKNFSAEIVFEPQTGQ      | 55  |
|                                     |                                                                |     |
| P.knowlesi_Malayan_Non-Reference    | ECIKCLPDNFCECECSCKNKTGFTMKYRHASKGSKQARYNVPTTKKNTSSGQST-NMNTK   | 108 |
| P.knowlesi_H_Curated                | ECIKCLPDNFCECECSCKNKTGFTMKYRHASKGSKQARYNVPTTKKNTSSGQST-NMNTK   | 108 |
| P.fragile_Nilgiri_Reference         | ECIKCLPDNFCECECSCKNKTGFTMKYRHASKGPKVQRDNLFTRSKHTSSGQSA-DMYTK   | 108 |
| P.coatneyi_Hackeri_Reference        | -----MKYRHASKGPKLERSNLLKNKNTSSGQSS-DMHTK                       | 35  |
| P.cynomolgi_B_Non-Reference         | ECIKCLPDNFCECECSCKNKTGFSMKYRHASKGSKLQRYNLLTSKKNNTSSGQST-DMHTK  | 107 |
| P.cynomolgi_M_Reference             | ECIKCLPDNFCECECSCKNKTGFSMKYRHASKGSKLQRYNLLTSKKNNTSSGQST-DMHTK  | 107 |
| P.vivax_P01_Curated                 | ECIKCLPDNFCECECSCKNKTGFSMKYRHASKGSKLQRYNLLTSKKNNTSSGQST-GMHTK  | 108 |
| P.vivax_Sal-1_Non-Reference         | ECIKCLPDNFCECECSCKNKTGFSMKYRHASKGSKLQRYNLLTSKKNNTSSGQST-GMHTK  | 108 |
| P.vivax-like                        | ECIKCLPDNFCECECSCKNKTGFSMKYRHASKGSKLQRYNLLTSKKNNTSSGQST-SMHTK  | 108 |
| P.praefalciparum_G01_Reference      | ECIKCLPDNFCECECSCKNKTGFSMKYRHASKGSKRYRK--KMTKTSARSRCN-DLPLE    | 113 |
| P.reichenowi_G01_Non-Reference      | ECIKCLPDNFCECECSCKNKTGFSMKYRHASKGSKRYRK--KMTKTSARSRCN-DLPLE    | 113 |
| P.reichenowi_CDC_Curated            | ECIKCLPDNFCECECSCKNKTGFSMKYRHASKGSKRYRK--KMTKTSARSRCN-DLPLE    | 114 |
| P.falciparum_3D7_Reference          | ECIKCLPDNFCECECSCKNKTGFSMKYRHASKGSKRYRK--KMTKTSARSRCN-DLPLE    | 114 |
| P.adleri_G01_Reference              | ECIKCLPDNFCECECSCKNKTGFSMKYRHASKGSKRYRK--KMTKTSARSRCN-DLPLE    | 114 |
| P.gaboni_SY75_Reference             | ECIKCLPDNFCECECSCKNKTGFSMKYRHASKGSKRYRK--KMTKTSARSRCN-DLPLE    | 114 |
| P.gaboni_G01_Non-Reference          | ECIKCLPDNFCECECSCKNKTGFSMKYRHASKGSKRYRK--KMTKTSARSRCN-DLPLE    | 114 |
| P.billcollinsi                      | ECIKCLPDNFCECECSCKNKTGFSMKYRHASKGSKRYRK--KMTKTSARSRCN-DLPLE    | 114 |
| P.blacklocki_G01                    | ECIKCLPDNFCECECSCKNKTGFSMKYRHASKGSKRYRK--KMTKTSARSRCN-DLPLE    | 114 |
| P.gallinaceum_8A                    | DCIKCLPENFCECECSCKNKTGFSMKYRNASLGSNSKRKSMNVNKKISRSRCKN-DLPIE   | 114 |
| P.relictum_SGS1-like_Curated        | ECIKCLPENFCECECSCKNKTGFSMKYRNASLGNIKR-KSRNMPKKSARSRTCK-DLPIK   | 113 |
| P.ovale_curtisi_GH01_Curated        | ECIKCLPDNFCECECSCKNKTGFSMKYRNASTGTKLMERGMKKNKTSARSRCN-DLPIE    | 114 |
| P.malariae_UG01_Curated             | ECIKCLPENFCECECSCKNKTGFSMKYRHASIGSKLTKSDMNTQKKSSPSRQNSDSSNV    | 118 |
| P.yoelii_17X_Curated                | ECVKCLPENFCECECSCKNKTGFSMKYRNASKGYKYLGDGGSNPLTDVKAS-SRSD-NNQ   | 113 |
| P.yoelii_YM_Non-Reference           | ECVKCLPENFCECECSCKNKTGFSMKYRNASKGYKYLGDGGSNPLTDVKAS-SRSD-NNQ   | 113 |
| P.berghei_ANKA_Curated              | ECVKCLPENFCECECSCKNKTGFSMKYRNASKGYKYLDSNNSNPLADVKAS-SRSDSNNQ   | 114 |
| P.chabaudi_Curated                  | ECVKCLPENFCECECSCKNKTGFSMKYRNASKGYKYLEGDSNPLAGAKAS-SRSDNNSQ    | 114 |
| P.vinckeii_petteri_CR_Non-Reference | ECVKCLPENFCECECSCKNKTGFSMKYRNASKGYKYLEGDSNPLAGTAKAS-SRSDNNSQ   | 114 |
|                                     | *****                                                          |     |





**Supplementary Table 1: Short and long form of *Plasmodium* chitinases and their corresponding WARP and SOAP proteins with conserved Cysteines (short chitinases), Serine and Threonine (long chitinases)**

| Host                                     | <i>Plasmodium</i> Chitinases                                                | Chitinase Protein Length (aa)<br>Putative | <i>Plasmodium von Willebrand factor A domain-related protein</i><br>(N-Terminal Conserved Cysteine/<br>C→S) | <i>Plasmodium secreted ookinete adhesive protein</i><br>(Conserved Cysteine/ C→S) |
|------------------------------------------|-----------------------------------------------------------------------------|-------------------------------------------|-------------------------------------------------------------------------------------------------------------|-----------------------------------------------------------------------------------|
| <b>Short form of chitinase</b>           |                                                                             |                                           |                                                                                                             |                                                                                   |
| Gorilla                                  | <b><i>P. adleri_G01</i></b><br>PADL01_1252400                               | <b>378</b>                                | Cysteine<br>PADL01_0800700                                                                                  | Cysteine<br>PADL01_1403900                                                        |
|                                          | <b><i>P. blacklocki_G01</i></b><br>PBLACG01_1252100                         | <b>378</b>                                | Cysteine<br>PBLACG01_0801500                                                                                | Cysteine<br>PBLACG01_1402900                                                      |
|                                          | <b><i>P. praefalciparum_strain_G01</i></b><br>PPRFG01_1203200               | <b>378</b>                                | Cysteine<br>PPRFG01_0802300                                                                                 | Cysteine<br>PPRFG01_1404700                                                       |
| Chimpanzee                               | <b><i>P. reichenowi_CDC</i></b><br>PRG01_1255500                            | <b>378</b>                                | Cysteine<br>PRCDC_0800900                                                                                   | Cysteine<br>PRCDC_1403600                                                         |
|                                          | <b><i>P. gaboni_strain_SY75</i></b><br>PGSY75_1252200                       | <b>378</b>                                | Cysteine<br>PGSY75_0801300                                                                                  | Cysteine<br>PGSY75_1404300                                                        |
|                                          | <b><i>P. billcollinsi_G01</i></b><br>PBILCG01_1251600                       | <b>378</b>                                | Cysteine<br>PBILCG01_0802000                                                                                | Cysteine<br>PBILCG01_1404900                                                      |
| Human                                    | <b><i>P. falciparum_3D7</i></b><br>PF3D7_1252200                            | <b>378</b>                                | Cysteine<br>PF3D7_0801300                                                                                   | Cysteine<br>PF3D7_1404300                                                         |
| <b>Short and Long form of chitinases</b> |                                                                             |                                           |                                                                                                             |                                                                                   |
| Birds                                    | <b><i>P. gallinaceum_8A</i></b><br>PGAL8A_00321200<br>PGAL8A_00321200       | <b>377</b><br><b>587</b>                  | Cysteine<br>PGAL8A_00077400                                                                                 | Cysteine<br>PGAL8A_00276100                                                       |
|                                          | <b><i>P. relictum_SGS1-like</i></b><br>PRELSG_1467600<br>PRELSG_0100100     | <b>377</b><br><b>587</b>                  | Cysteine<br>PRELSG_0116700                                                                                  | Cysteine<br>PRELSG_1346700                                                        |
| Human                                    | <b><i>P. ovale_curtisi_GH01</i></b><br>PocGH01_14076700<br>PocGH01_01010400 | <b>360</b><br><b>664</b>                  | Serine<br>PocGH01_01026500                                                                                  | Cysteine<br>PocGH01_13055300                                                      |
| <b>Long form of chitinase</b>            |                                                                             |                                           |                                                                                                             |                                                                                   |
| Human                                    | <b><i>P. vivax_like_Pvl01</i></b><br>PVL_010005600                          | <b>656</b>                                | Serine<br>PVL_000082800                                                                                     | Serine<br>PVL_130032400                                                           |
|                                          | <b><i>P. vivax_Sal-1</i></b><br>PVX_087680                                  | <b>650</b>                                | Serine<br>PVX_093675                                                                                        | Serine<br>PVX_086220                                                              |
|                                          | <b><i>P. vivax_P01_Strain</i></b><br>PVP01_0102800                          | <b>650</b>                                | Serine<br>PVP01_0118900                                                                                     | Serine<br>PVP01_1344500                                                           |
|                                          | <b><i>P. knowlesi_Malayan Strain Pk1 A</i></b><br>PKNOH_S01009100           | <b>699</b>                                | Serine<br>PKNOH_S01026100                                                                                   | Serine<br>PKNOH_S05397700                                                         |
|                                          | <b><i>P. knowlesi_strain H</i></b><br>PKNH_0100800                          | <b>699</b>                                | Serine<br>PKNH_0117600                                                                                      | Serine<br>PKNH_1353800                                                            |
|                                          | <b><i>P. malariae_UG01_Strain</i></b><br>PmUG01_01014100                    | <b>652</b>                                | Serine<br>PmUG01_01030600                                                                                   | Glutamine<br>PmUG01_13054000                                                      |

|         |                                                                |            |                                   |                                 |
|---------|----------------------------------------------------------------|------------|-----------------------------------|---------------------------------|
| Monkeys | <b><i>P. coatneyi_Hackeri</i></b><br><i>PCOAH_00000160</i>     | <b>651</b> | Serine<br><i>PCOAH_00002130</i>   | Serine<br><i>PCOAH_00050920</i> |
|         | <b><i>P. fragile_strain nilgiri</i></b><br><i>AK88_00948</i>   | <b>592</b> | Serine<br><i>AK88_04713</i>       | Serine<br><i>AK88_01823</i>     |
|         | <b><i>P. inui_San Antonio 1</i></b><br><i>C922_03037</i>       | <b>642</b> | Serine<br><i>C922_05041</i>       | -                               |
|         | <b><i>P. vinckei_petteri_strain CR</i></b><br><i>YYG_01138</i> | <b>611</b> | Threonine<br><i>YYG_02286</i>     | Serine<br><i>YYG_00730</i>      |
|         | <b><i>P. cynomolgi_strain_B</i></b><br><i>PCYB_011010</i>      | <b>443</b> | Serine<br><i>PCYB_012570</i>      | Serine<br><i>PcyM_1351800</i>   |
| Rodents | <b><i>P. berghei_ANKA</i></b><br><i>PBANKA_0800500</i>         | <b>648</b> | Serine<br><i>PBANKA_1228900</i>   | Serine<br><i>PBANKA_1037800</i> |
|         | <b><i>P. yoelii_17XNL</i></b><br><i>PY00008</i>                | <b>697</b> | Threonine<br><i>PY07681</i>       | -                               |
|         | <b><i>P. yoelii_17X</i></b><br><i>PY17X_0803000</i>            | <b>720</b> | Threonine<br><i>PY17X_1232400</i> | Serine<br><i>PY17X_1040200</i>  |
|         | <b><i>P. yoelii_YM</i></b><br><i>PYYM_0802900</i>              | <b>700</b> | Threonine<br><i>PYYM_1231600</i>  | Serine<br><i>PYYM_1039900</i>   |
|         | <b><i>P. chabaudi</i></b><br><i>PCHAS_0800800</i>              | <b>710</b> | Threonine<br><i>PCHAS_1229600</i> | Serine<br><i>PCHAS_1038600</i>  |
